# Supplementary material
Source: PubMed Central journal article supplement (PMC10992901)

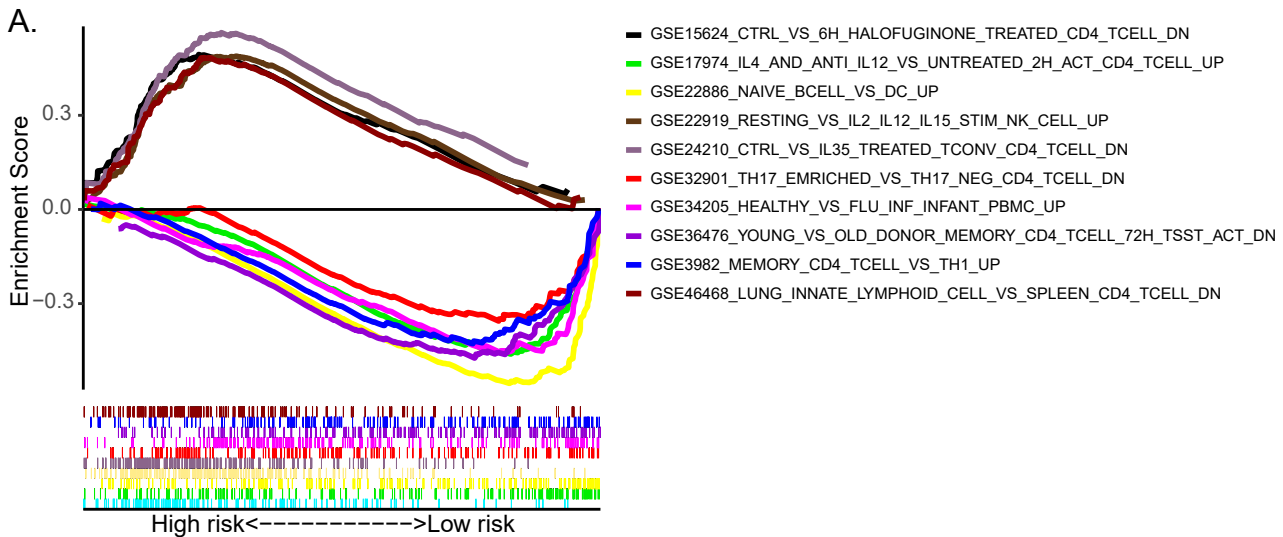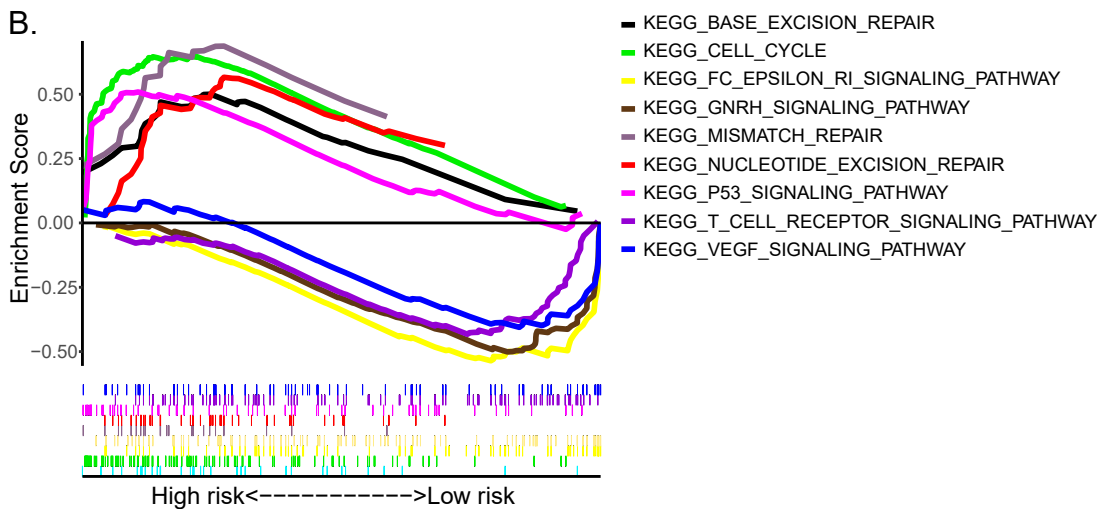

Supplement: 262_2021_3069_MOESM3_ESM.pdf [file 262_2021_3069_MOESM3_ESM.pdf]
